# Supplementary material for: Systematic Analysis and Prediction of In Situ Cross Talk of O-GlcNAcylation and Phosphorylation
Source: Biomed Res Int. 2015 Oct 27;2015:279823. doi: 10.1155/2015/279823 (PMC4639640; doi:10.1155/2015/279823)
Supplement: Supplementary file 1 — Table S1: It lists the extracted motifs from motif analysis and relevant information of sites containing the motif. Enriched GO terms obtained from GO enrichment analysis and GeneMANIA analysis are also contained. Table S2: Top 10 GO terms associated with phos-based classier ranked by MRMR and top 20 GO associated with O-GlcNAc-based classier are listed. Table S3: Top 10 potential in situ O-GlcNAc/Phos cross talk sites that were annotated with only phosphorylation are listed. [file 279823.f1.xlsx]

## Sheet: Sheet1
Motif	Protein	Site	Sequences	Species	Gene	Conservation Score	GO biological process	GO molecular function	GeneMANIA function prediction
.......P..S..........	O95832	205	TPRPYPKPAPSSGKDYV****	human	CLDN1	0.8			protein localization to nucleus (1.74E-04)
.......P..S..........	P05783	31	APSYGARPVSSAASVYAGAGG	human	KRT18	0.777778			endomembrane system organization (1.74E-04)
.......P..S..........	P10636	717	AEIVYKSPVVSGDTSPRHLSN	human	MAPT	1
.......P..S..........	P12270	1676	TANIKPTPVVSTPSKVTAAAM	human	TPR	0.888889
.......P..S..........	P31749	473	SERRPHFPQFSYSASGTA***	human	AKT1	1
.......P..S..........	P49023-2	84	SRFIHQQPQSSSPVYGSSAKT	human	PXN	0.375
.......P..S..........	P49792	1400	LAETVFTPKTSPENVQDRFAL	human	RANBP2	0.75
.......P..S..........	P50402	53	TQRRRLSPPSSSAASSYSFSD	human	EMD	0.75
.......P..S..........	P50402	54	QRRRLSPPSSSAASSYSFSDL	human	EMD	0.75
.......P..S..........	Q01082	2324	SASTQSTPASSRAQTLPTSVV	human	SPTBN1	1
.......P..S..........	Q96PK6	244	PATYRAQPSVSLGAAYRAQPS	human	RBM14	0.875
.......P..S..........	Q96PK6	256	GAAYRAQPSASLGVGYRTQPM	human	RBM14	0.75
.......P..S..........	Q96PK6	280	AASYRAQPSVSLGAPYRGQLA	human	RBM14	1
.......P..S..........	Q9UQ35	2236	ANLASRIPAASAAAMNLASAR	human	SRRM2	0.888889
......T...S..........	Q8K4G5	499	RMIHRSTSQGSINSPVYSRHS	mouse	ABLIM1	0.888889		cytoskeletal protein binding ( 9.7E-03)	axon part (2.1E-03)
......T...S..........	Q8BRT1	459	SRGRSRTKMVSQSQPGSRSGS	mouse	CLASP2	0.769231			cognition (4.6E-02)
......T...S..........	Q8R1A4	190	SMSIDDTPRGSWACSIFDLKN	mouse	DOCK7	1
......T...S..........	O88737	1510	KLGPRATAEFSTQTPSLTLSS	mouse	BSN	0.777778
......T...S..........	O88935	605	PGPAGPTRQASQAGPGPRTGP	mouse	SYN1	0.75
......T...S..........	P04370	201	DSHTRTTHYGSLPQKSQHGRT	mouse	MBP	0.555556
......T...S..........	Q62261	2323	SASTQSTPASSRAQTLPTSVV	mouse	SPTBN1	1
......T...S..........	Q3U182	173	PSALNRTSSDSALHTSVMNPN	mouse	CRTC2	1
......T...S..........	O88737	2822	PHRLLDTSFASSERLNKAHVS	mouse	BSN	0.666667
......T...S..........	O35927	458	GTFRTSTAPSSPGVDSVPLQR	mouse	CTNND2	0.785714
..........T.........P	P31749	308	EGIKDGATMKTFCGTPEYLAP	human	AKT1	1
..........T.........P	Q13443	777	PIYANRFAVPTYAAKQPQQFP	human	ADAM9	0.666667			response to peptide hormone (2.2E-09)
..........T.........P	P42229	92	LLKIKLGHYATQLQKTYDRCP	human	STAT5A	0.692308	positive regulation of cell cycle (5.1E-02)
..........T.........P	P51610	738	ADGKPTTIITTTQASGAGTKP	human	HCFC1	1
..........T.........P	P02545	643	GGGSFGDNLVTRSYLLGNSSP	human	LMNA	0.571429
Note: gray lines mean either the motifs in these proteins are unconservative or these proteins are orthologous with others
