# Supplementary material for: Systematic Analysis and Prediction of In Situ Cross Talk of O-GlcNAcylation and Phosphorylation
Source: Biomed Res Int. 2015 Oct 27;2015:279823. doi: 10.1155/2015/279823 (PMC4639640; doi:10.1155/2015/279823)
Supplement: Supplementary file 2 [file 279823.f2.xlsx]

## Sheet: Phos-based classifier
Rank	Score (by MRMR)	GO term
1	0.036	GO:0016032	viral process
2	0.028	GO:0034362	low-density lipoprotein particle
3	0.021	GO:0046827	positive regulation of protein export from nucleus
4	0.019	GO:0042593	glucose homeostasis
5	0.016	GO:0042542	response to hydrogen peroxide
6	0.016	GO:0097110	scaffold protein binding
7	0.016	GO:0034361	very-low-density lipoprotein particle
8	0.015	GO:0006809	nitric oxide biosynthetic process
9	0.013	GO:0006936	muscle contraction
10	0.012	GO:0001889	liver development

## Sheet: O-GlcNAc-based classifier
Rank	Score (by MRMR)	GO term
1	0.05	GO:0097110	scaffold protein binding
2	0.043	GO:0043984	histone H4-K16 acetylation
3	0.033	GO:0001938	positive regulation of endothelial cell proliferation
4	0.027	GO:0006936	muscle contraction
5	0.023	GO:0070062	extracellular exosome
6	0.024	GO:0006921	cellular component disassembly involved in execution phase of apoptosis
7	0.019	GO:0008536	Ran GTPase binding
8	0.02	GO:0030049	muscle filament sliding
9	0.019	GO:0005819	spindle
10	0.018	GO:0005640	nuclear outer membrane
11	0.016	GO:0016568	chromatin modification
12	0.016	GO:0005911	cell-cell junction
13	0.015	GO:0030097	hemopoiesis
14	0.015	GO:0005829	cytosol
15	0.015	GO:0005874	microtubule
16	0.015	GO:0001934	positive regulation of protein phosphorylation
17	0.016	GO:0071339	MLL1 complex
18	0.017	GO:0005882	intermediate filament
19	0.014	GO:0048147	negative regulation of fibroblast proliferation
20	0.014	GO:0046600	negative regulation of centriole replication
