# Supplementary material for: Systematic Analysis and Prediction of In Situ Cross Talk of O-GlcNAcylation and Phosphorylation
Source: Biomed Res Int. 2015 Oct 27;2015:279823. doi: 10.1155/2015/279823 (PMC4639640; doi:10.1155/2015/279823)
Supplement: Supplementary file 3 [file 279823.f3.xlsx]

## Sheet: 工作表1
Protein	Site	Sequence	Species	Gene	Residue	Probability	Note
Q9NR64	77	TFWKKPSSSSSSSSSPSSSSS	human	KLHL1	S	0.67144	N
P18206	574	GESPQARALASQLQDSLKDLK	human	VCL	S	0.57721	N
Q92545	1336	LAHPSHPERASSARHSSEDSD	human	TMEM131	S	0.562091	N
O94875	165	HKPDDDTDMYNTPYTYNAGLY	human	SORBS2	T	0.51772	N
B2CW77	35	KVRNGRKLQPSEWAGRGDLGG	human	KLLN	S	0.514223	N
Q8N684	191	PRGGIPPRAHSRDSSDSADGR	human	CPSF7	S	0.50727	N
Q8N3X1	429	RALEEGDGSVSGSSPRSDISQ	human	FNBP4	S	0.487819	Y
Q8IYB3	414	PATPPPKTRHSPTPQQSNRTR	human	SRRM1	S	0.478483	N
Q7Z460-3	1104	TPSRHTSSRTSPLTSPTNCSH	human	CLASP1	S	0.476403	N
O95433	218	KITLKETFLTSPEELYRVFTT	human	AHSA1	S	0.461896	N
